# Supplementary material for: Ageing Suitability Evaluation of Residential Districts Based on Active Ageing Theory
Source: MDPI journal article supplement (doi:10.3390/buildings13041041), 2023-04-15
Supplement: s1 [file s1]

Archive with 1 entries (1 files):
- buildings-2336189-supplementary.pdf
